# Supplementary material for: External Validation Study of a Chest Radiograph-Derived Aging Biomarker for ICU Mortality Prediction
Source: Research Square preprint supplement (doi:10.21203/rs.3.rs-6708615/v1), 2025-06-09
Supplement: Supplementary file 1 [file 3d3f5e986e4fb79b4e3527eb.docx]

**Additional File 2. Accuracy, sensitivity, specificity, positive predictive value, and negative predictive value of the mortality prediction models**

|  | **Accuracy** | **Sensitivity** | **Specificity** | **Positive Predictive Value** | **Negative Predictive Value** |
| --- | --- | --- | --- | --- | --- |
| **SAPS II model** |  | | | | |
| Conventional model | 0.76  (0.71–0.85) | 0.73  (0.62–0.80) | 0.76  (0.71–0.87) | 0.20  (0.17–0.28) | 0.97  (0.97–0.98) |
| Xp-age model | 0.77  (0.68–0.83) | 0.74  (0.65–0.84) | 0.77  (0.67–0.85) | 0.20  (0.16–0.26) | 0.97  (0.97–0.98) |
| **APACHE II model** |  | | | | |
| Conventional model | 0.78  (0.70–0.83) | 0.65  (0.55–0.77) | 0.79  (0.70–0.86) | 0.26  (0.21–0.33) | 0.78  (0.70–0.83) |
| Xp-age model | 0.80  (0.67–0.86) | 0.69  (0.58–0.84) | 0.82  (0.66–0.88) | 0.29  (0.21–0.37) | 0.80  (0.67–0.86) |
| **SOFA model** |  | | | | |
| Conventional model | 0.78  (0.69–0.80) | 0.74  (0.68–0.84) | 0.78  (0.68–0.81) | 0.18  (0.14–0.20) | 0.78  (0.69–0.80) |
| Xp-age integrated model | 0.75  (0.63–0.83) | 0.80  (0.70–0.92) | 0.75  (0.61–0.84) | 0.17  (0.13–0.23) | 0.75  (0.63–0.83) |
| Chronological age integrated model | 0.72  (0.64–0.82) | 0.80  (0.68–0.88) | 0.71  (0.63–0.83) | 0.16  (0.13–0.21) | 0.72  (0.64–0.82) |

Data are proportions (95% confidence interval).
