# Supplementary material for: External Validation Study of a Chest Radiograph-Derived Aging Biomarker for ICU Mortality Prediction
Source: Research Square preprint supplement (doi:10.21203/rs.3.rs-6708615/v1), 2025-06-09
Supplement: Supplementary file 2 [file 627ab76fd86e5833b155b74b.docx]

**Additional File 4.** Bar charts of feature importance for the three XGBoost prediction models

Feature importance values for Xp-age incorporated prediction models using XGBoost. (A) The Xp-age based SAPS II model. (B) The Xp-age based APACHE II model. (C) The Xp-age integrated SOFA model.
