# Supplementary material for: External Validation Study of a Chest Radiograph-Derived Aging Biomarker for ICU Mortality Prediction
Source: Research Square preprint supplement (doi:10.21203/rs.3.rs-6708615/v1), 2025-06-09
Supplement: Supplementary file 3 [file 7d22f4bc03f528030b7663d7.docx]

**Additional File 3. Table showing feature importance values for the three XGBoost prediction models**

| **Features of**  **Xp-age based SAPS II model** | **Importance** | **Features of Xp-age based APACHE II model** | **Importance** | **Features of**  **Xp-age integrated SOFA model** | **Importance** |
| --- | --- | --- | --- | --- | --- |
| Urine output | 0.16 | pH | 0.13 | Renal function | 0.26 |
| PaO2/FIO2 ratio | 0.11 | White blood  cells | 0.077 | Central nervous  system | 0.23 |
| Bicarbonate | 0.098 | Central nervous  system | 0.076 | Cardiovascular system | 0.17 |
| Central nervous  System | 0.075 | Body  temperature | 0.075 | Respiratory system | 0.095 |
| White blood cells | 0.06 | PaO2 or  AaDO2 | 0.074 | Coagulation | 0.089 |
| Scheduled surgery | 0.058 | Sodium | 0.074 | Xp-age | 0.077 |
| Blood pressure | 0.057 | Potassium | 0.07 | Liver | 0.073 |
| Potassium | 0.054 | Respiratory rate | 0.063 |  |  |
| Sodium | 0.053 | Chronic disease | 0.062 |  |  |
| Urea nitrogen | 0.052 | Xp-age | 0.062 |  |  |
| Bilirubin | 0.047 | Blood pressure | 0.061 |  |  |
| Heart rate | 0.044 | Hematocrit | 0.059 |  |  |
| Xp-age | 0.041 | Creatinine | 0.058 |  |  |
| Body temperature | 0.041 | Heart rate | 0.052 |  |  |
| Chronic disease | 0.035 |  |  |  |  |

Abbreviations: PaO2, partial pressure of arterial oxygen; FIO2, fraction of inspiratory oxygen; AaDO2, alveolar-arterial oxygen difference.
