# Supplementary material for: External Validation Study of a Chest Radiograph-Derived Aging Biomarker for ICU Mortality Prediction
Source: Research Square preprint supplement (doi:10.21203/rs.3.rs-6708615/v1), 2025-06-09
Supplement: Supplementary file 4 [file faa7e364e3359dc7a48b6048.docx]

**Additional File 1. Hyperparameters of XGBoost**

Grid search was conducted to optimize the hyperparameters of XGBoost. The following key hyperparameters were selected for tuning: learning rate, maximum tree depth, minimum sum of instance weight needed in a child node, subsample ratio of training instances, L1 regularization term (alpha), and L2 regularization term (lambda). For the grid search, we explored learning rates of 0.01, 0.05, and 0.1; maximum tree depths of 3, 5, and 7; minimum child weights of 1, 3, and 5; subsample ratios of 0.6, 0.8, and 1.0; and regularization terms (both alpha and lambda) of 0, 0.1, and 0.5.
